# Supplementary material for: Why do open-label placebos work? A randomized controlled trial of an open-label placebo induction with and without extended information about the placebo effect in allergic rhinitis
Source: PLoS One. 2018 Mar 7;13(3):e0192758. doi: 10.1371/journal.pone.0192758 (PMC5841659; doi:10.1371/journal.pone.0192758)
Supplement: S1 Dataset — (XLS) [file pone.0192758.s002.xls]

## Sheet: Tabelle1
patients	placebo (yes = 1)	expectancy (yes = 1)	age	sex	pre symptoms (compositve score)	post symptoms (compositve score)	pre HRQL (KSK)	post HRQL (KSK)	pre HRQL (PSK)	post HRQL (PSK)
1	1	1	23	2	4.1	2.9	55.26	56.18	48.74	33.7529
2	1	1	21	2	3.56667	3.13333	55.18	56.37	47.92	40.2006
3	1	1	25	2	4.6	2.13333	33.09	49.52	53.85	47.9381
4	1	1	23	1	2.96667	3.03333	55.97	54.29	39.96	37.8322
5	1	1	20	2	2.83333	2.1	57.8	59.52	45.4	46.6315
6	1	1	20	2	3.16667	2.4	60.02	57.98	29.06	36.53
7	1	1	27	2	2.73333	1.4	51.56	56.52	43.24	44.1354
8	1	1	26	1	3.56667	3.33333	53.82	51.81	50.51	53.371
9	1	1	22	1	3.3	2.76667	55.03	53.75	35.5	45.1786
10	1	1	21	2	2.2	1.63333	62.01	56.56	31.14	45.2966
11	1	1	18	2	4.2	2.96667	39.64	49.17	50.42	52.977
12	1	1	21	2	2.43333	1.96667	53.4	49.15	55.18	56.3647
13	1	1	54	1	3.4	3.06667	58.71	53.26	42.12	51.261
14	2	1	53	2	2.6	1.96667	51.66	51.66	40.74	40.746
15	2	1	22	2	4.26667	5.13333	53.6	46.02	32.6	39.4193
16	2	1	18	2	4.8	3.3	30.45	44.11	44.74	44.8239
17	2	1	20	2	4.93333	3.96667	51.35	54.52	33.94	53.2561
18	2	1	20	2	2.83333	3.66667	54.07	52.14	52.8	52.285
19	2	1	21	2	4.06667	3.13333	65.74	61.84	21.73	20.6501
20	2	1	24	2	4.23333	4.2	44.12	44.2	31.09	31.7603
21	2	1	29	2	2.63333	2.43333	56.88	56.79	56.51	55.8441
22	2	1	28	2	3.36667	3.43333	43.21	42.21	38.8	40.6558
23	2	2	26	1	3.2	2.5	59.75	53.62	45.1787	37.6898
24	2	2	26	2	2.56667	4.33333	58.76	57.03	48.7372	51.8823
25	2	2	30	2	2.8	3.16667	53.43	53.16	52.1196	46.3047
26	2	2	25	2	3.83333	3.56667	56.16	58.02	58.1197	54.7827
27	2	2	23	2	2.06667	1.26667	55.09	51.75	45.9727	51.1609
28	2	2	25	2	4.73333	5	50.34	43.9	51.655	40.0798
29	2	2	22	2	1.33333	2.76667	60.48	43	33.3825	37.484
30	2	2	19	2	4.3	4.53333	47.59	39.38	45.269	48.6062
31	2	2	37	2	3.7	3.23333	37.9	44.34	47.4965	53.2534
32	2	2	29	2	1.8	2.1	40.21	60.56	46.7821	35.8709
33	2	2	28	2	3.2	2.66667	52.89	54.27	50.518	49.1332
34	1	2	23	2	2.8	2.8	54.68	35.46	52.7476	59.2946
35	1	2	21	2	3.53333	4.3	43.63	41.85	33.4267	27.5429
36	1	2	32	1	3	1.86667	62.28	58.38	37.6399	46.2163
37	1	2	20	2	3.66667	3.53333	39.65	36.07	48.0759	55.219
38	1	2	23	2	2.53333	1.8	51	57.17	51.2633	52.8113
39	1	2	21	2	2.73333	2.1	56.04	57.45	48.1401	48.1694
40	1	2	20	2	2.46667	2.73333	49.37	58.68	45.1764	34.7465
41	1	2	22	2	4.4	3.23333	50.94	49.45	52.5209	48.9858
42	1	2	21	2	4.53333	4.3	64.31	59.49	21.8678	31.1163
43	1	2	23	1	2.56667	1.83333	53.78	57.73	30.5151	22.7611
44	1	2	23	2	5	2.6	53.33	52.71	48.6139	44.0798
45	1	2	21	1	2.56667	2.83333	53.49	54.22	34.8703	34.7551
46	1	2	25	1	2.03333	2.3	58.25	51.7	28.256	31.666
